# Supplementary material for: Integrated Methylome and Transcriptome Analysis Provides Insights into the DNA Methylation Underlying the Mechanism of Cytoplasmic Male Sterility in Kenaf (Hibiscus cannabinus L.)
Source: MDPI journal article supplement (doi:10.3390/ijms23126864), 2022-06-20
Supplement: s1 [file s1]

**Table S7** Primer sequences for qRT-PCR.

| Gene name                               | Sequence (5'-3')            |                            |
|-----------------------------------------|-----------------------------|----------------------------|
|                                         | Forward                     | Reverse                    |
| <i>His3</i> (reference gene)            | ATGGCCCGTACCAAGCAAACC       | TAAGCACGCTCGCCCTGAT        |
| <i>atp8</i>                             | CATTGAGGTTGGCGAGATAATAAAG   | AAGTGACAGTCGTTTCCCATCG     |
| <i>beta-fructofuranosidase</i>          | CACACATACGACAAGAGCGGC       | AAGAGGGTCAGAGTGGTCAGCAG    |
| <i>beta-glucosidase</i>                 | CGGGATTCTTATGTCTTTGCTC      | CTTCGTTGATGCCCTATTGTGTC    |
| <i>COX2</i>                             | AGCAGCAAAGATTGAAGTGAAAGAG   | AGAGTAACAAAGTTGAACAGACAGCC |
| <i>DDM1</i>                             | GCACTGCTACGGAACGAAGAAAC     | CACAAAAGAGGTAAACCTCCGCATC  |
| <i>DME</i>                              | ACTGGAAGCAAGATGGTGAAGG      | GCAAAGACACTATGGATTCCCTGG   |
| <i>DRM1</i>                             | GACGAAAATGGGGTATTGAGAGGC    | CAGAATGGCTTCCTATCTTCAACCG  |
| <i>DRM2</i>                             | ATGTCCTCTCTGGTTGGTTTGTTT    | TGGTAACTCGTTTCAGGTTGACACAG |
| <i>fatty acid amide hydrolase</i>       | CTTCGACGCTGGACGATAG         | ATAAACTGCTCCGCAACCCTC      |
| <i>GA2ox6</i>                           | GGCTCAATCACTATCCACCATCC     | GACAGGGACCCAGACAGCATC      |
| <i>IAA32</i>                            | GGATGGAGTTTGGTTGGTCGC       | ATACGCAGCCGTTTCACCCG       |
| <i>ILR1</i>                             | ACCCTCCAACCATAAACGATAACG    | TTTGGGCTGCTCTCATCTTGC      |
| <i>JMJ705</i>                           | CAGGGTTGAGGGCTATTGTGG       | CCTGAATGATAGGCTCTCGGG      |
| <i>MADS-box protein AGL29</i>           | TCGCTACCCCTTTGTGCCGTTT      | GATTTAGAAACCGCTCCGCTACTG   |
| <i>MADS-box protein AGL30</i>           | GCAGAAAAGGGATGCTACCACTC     | TACCACTTTTGTCTGGCGATG      |
| <i>MADS-box protein AGL62</i>           | ATTAGAGGATAAGAGGAAGCGTGGC   | GATTTGAGTTGCTTCAGTGTGGAGAG |
| <i>MADS-box protein AGL66</i>           | CGTGGTGCGGAATAAAGAGTT       | GTTTGAGTTAGTGGTGGCGGT      |
| <i>MADS-box transcription factor</i>    | TTTTGGAGGAGGATTACAAGCACC    | GCATCTGAGAGTTGTAGTCCTGGG   |
| <i>MADS-box transcription factor 23</i> | TTTGAACCAGAATCATCTACCATAAGG | GCCTGTCCAACCTCCAACCTAAGCC  |
| <i>MADS-box transcription factor 27</i> | TGCGATGCCGAGGTTGG           | TACTTGTTGCCTCAAACCTTGCTACC |
| <i>MET1</i>                             | TGGACTGCTGTTTTTGGTTTCACTG   | GTTCACTCCGTTAGCCACCTCAG    |
| <i>MYB21</i>                            | TTGACTACCGTTTCTGATTTCAATTC  | CGTCCCTGAACGTGTTTGTCTGC    |
| <i>MYB26</i>                            | CAGTGCCCAAACCTCTGTGAAATCC   | GCAGGAGCAGCAGGCATCG        |
| <i>phytochrome B</i>                    | AATCACCGCTACTGTCTAAAATCC    | GTAGGCGATGATACGAAACTGG     |
| <i>protein WLIM2b</i>                   | AAATCCGAAAAGCAAAAACAACCTG   | CCTCCACTGTACCTTCTCTAACG    |
| <i>pyruvate kinase</i>                  | TAAAGGGTGATGAGAACTGATAAGC   | GTCGCAAGACAAGACGGTGAAC     |
| <i>ROS1</i>                             | ACTACACCACAGCCAAAACAAAGG    | GGAGGATTGATGCGTCTTTTCTAC   |
